# Supplementary material for: Oxonium ion scanning mass spectrometry for large-scale plasma glycoproteomics
Source: PubMed Central journal article supplement (PMC10963274; doi:10.1038/s41551-023-01067-5), 2023-07-20
Supplement: 41551_2023_1067_MOESM1_ESM.pdf [file 41551_2023_1067_MOESM1_ESM.pdf]

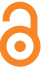

---

# Oxonium ion scanning mass spectrometry for large-scale plasma glycoproteomics

---

In the format provided by the authors and unedited

**Supplementary Table 1 | IgG glycopeptides identified by OxoScan-MS analysis.**

| IgG | Glycan | m/z       | Monoisotopic Mass | Charge | RT    | [M+H] <sup>+</sup> | Peptide Mass | Glycan Mass | peak_num | Literature Precursor Monoisotopic | PPM Mass Error |
|-----|--------|-----------|-------------------|--------|-------|--------------------|--------------|-------------|----------|-----------------------------------|----------------|
| 1   | G0     | 830.0054  | 2486.9943         | 3      | 27.55 | 2488.0016          | 1188.5047    | 1299.4969   | 17       | 2486.981                          | 5.484          |
| 1   | G0F    | 878.6832  | 2633.0277         | 3      | 26.85 | 2634.035           | 1188.5047    | 1445.5303   | 7        | 2633.039                          | 4.128          |
| 1   | G0FN   | 946.3678  | 2836.0815         | 3      | 27.95 | 2837.0888          | 1188.5047    | 1648.5841   | 14       | 2836.118                          | 12.849         |
| 1   | G1F    | 932.6988  | 2795.0745         | 3      | 26.55 | 2796.0818          | 1188.5047    | 1607.5771   | 4        | 2795.091                          | 6.044          |
| 1   | G1F    | 932.7058  | 2795.0955         | 3      | 26.96 | 2796.1028          | 1188.5047    | 1607.5981   | 18       | 2795.091                          | 1.47           |
| 1   | G1FN   | 1000.3946 | 2998.1619         | 3      | 27.75 | 2999.1692          | 1188.5047    | 1810.6645   | 13       | 2998.171                          | 2.957          |
| 1   | G1FS1  | 1029.7458 | 3086.2155         | 3      | 28.75 | 3087.2228          | 1188.5047    | 1898.7181   | 21       | 3086.187                          | 9.296          |
| 1   | G2F    | 986.7129  | 2957.1168         | 3      | 26.46 | 2958.1241          | 1188.5047    | 1769.6194   | 8        | 2957.144                          | 9.271          |
| 1   | G2FN   | 1054.4152 | 3160.2237         | 3      | 27.55 | 3161.231           | 1188.5047    | 1972.7263   | 20       | 3160.224                          | 0.035          |
| 1   | G2FS1  | 1083.7589 | 3248.2548         | 3      | 28.15 | 3249.2621          | 1188.5047    | 2060.7574   | 11       | 3248.24                           | 4.669          |
| 2   | G0     | 819.3432  | 2455.0077         | 3      | 52.15 | 2456.015           | 1156.5149    | 1299.5001   | 35       | 2454.991                          | 6.859          |
| 2   | G0F    | 868.0212  | 2601.0417         | 3      | 50.95 | 2602.049           | 1156.5149    | 1445.5341   | 1        | 2601.049                          | 2.718          |
| 2   | G0FN   | 935.703   | 2804.0871         | 3      | 51.25 | 2805.0944          | 1156.5149    | 1648.5795   | 9        | 2804.128                          | 14.636         |
| 2   | G1F    | 922.0331  | 2763.0774         | 3      | 50.15 | 2764.0847          | 1156.5149    | 1607.5698   | 3        | 2763.102                          | 8.756          |
| 2   | G1F    | 922.031   | 2763.0711         | 3      | 50.75 | 2764.0784          | 1156.5149    | 1607.5635   | 5        | 2763.102                          | 11.036         |
| 2   | G1FN   | 989.7264  | 2966.1573         | 3      | 50.55 | 2967.1646          | 1156.5149    | 1810.6497   | 12       | 2966.181                          | 7.978          |
| 2   | G1FN   | 989.7217  | 2966.1432         | 3      | 50.95 | 2967.1505          | 1156.5149    | 1810.6356   | 27       | 2966.181                          | 12.732         |
| 2   | G1FS1  | 1019.0768 | 3054.2085         | 3      | 53.65 | 3055.2158          | 1156.5149    | 1898.7009   | 10       | 3054.197                          | 3.762          |
| 2   | G2F    | 976.0541  | 2925.1404         | 3      | 49.85 | 2926.1477          | 1156.5149    | 1769.6328   | 2        | 2925.154                          | 4.792          |
| 2   | G2FN   | 1043.7621 | 3128.2644         | 3      | 50.25 | 3129.2717          | 1156.5149    | 1972.7568   | 15       | 3128.234                          | 9.785          |
| 2   | G2FS1  | 1073.0854 | 3216.2343         | 3      | 52.75 | 3217.2416          | 1156.5149    | 2060.7267   | 6        | 3216.25                           | 4.829          |
| 4   | G0F    | 873.36    | 2617.0581         | 3      | 38.05 | 2618.0654          | 1172.5098    | 1445.5556   | 19       | 2617.044                          | 5.514          |
| 4   | G0FN   | 941.0292  | 2820.0657         | 3      | 38.55 | 2821.073           | 1172.5098    | 1648.5632   | 33       | 2820.123                          | 20.333         |
| 4   | G1F    | 927.3766  | 2779.1079         | 3      | 37.45 | 2780.1152          | 1172.5098    | 1607.6054   | 23       | 2779.096                          | 4.105          |
| 4   | G1F    | 927.3892  | 2779.1457         | 3      | 37.15 | 2780.153           | 1172.5098    | 1607.6432   | 69       | 2779.096                          | 17.706         |
| 4   | G1F    | 927.3757  | 2779.1052         | 3      | 37.95 | 2780.1125          | 1172.5098    | 1607.6027   | 43       | 2779.096                          | 3.133          |
| 4   | G1FN   | 995.058   | 2982.1521         | 3      | 38.15 | 2983.1594          | 1172.5098    | 1810.6496   | 36       | 2982.176                          | 7.969          |
| 4   | G2F    | 981.38    | 2941.1181         | 3      | 37.24 | 2942.1254          | 1172.5098    | 1769.6156   | 26       | 2941.149                          | 10.614         |
| 4   | G2FN   | 1049.0927 | 3144.2562         | 3      | 37.85 | 3145.2635          | 1172.5098    | 1972.7537   | 81       | 3144.229                          | 8.75           |
| 4   | G2FS1  | 1078.4419 | 3232.3038         | 3      | 39.55 | 3233.3111          | 1172.5098    | 2060.8013   | 24       | 3232.245                          | 18.274         |

**Supplementary Table 2 | COVID-19 clinical cohort demographics.**

| <b>Sample ID</b> | <b>Age</b> | <b>Sex</b> | <b>WHO Grade</b> | <b>Clinical Category</b> | <b>Sample ID</b> | <b>Age</b> | <b>Sex</b> | <b>WHO Grade</b> | <b>Clinical Category</b> |
|------------------|------------|------------|------------------|--------------------------|------------------|------------|------------|------------------|--------------------------|
| HD-1             | 27         | w          | 0                | Healthy                  | CV-66            | 75         | w          | 3                | Mild                     |
| HD-2             | 23         | m          | 0                | Healthy                  | CV-75            | 84         | m          | 3                | Mild                     |
| HD-3             | 34         | w          | 0                | Healthy                  | CV-11            | 61         | m          | 5                | Moderate                 |
| HD-4             | 31         | w          | 0                | Healthy                  | CV-24            | 64         | m          | 4                | Moderate                 |
| HD-5             | 30         | m          | 0                | Healthy                  | CV-38            | 70         | m          | 4                | Moderate                 |
| HD-6             | 41         | w          | 0                | Healthy                  | CV-48            | 48         | m          | 4                | Moderate                 |
| HD-7             | 24         | w          | 0                | Healthy                  | CV-50            | 78         | m          | 4                | Moderate                 |
| HD-8             | 27         | m          | 0                | Healthy                  | CV-16            | 74         | m          | 5                | Moderate                 |
| HD-9             | 30         | w          | 0                | Healthy                  | CV-63            | 61         | m          | 5                | Moderate                 |
| HD-10            | 34         | w          | 0                | Healthy                  | CV-8             | 63         | m          | 7                | Severe                   |
| HD-11            | 42         | m          | 0                | Healthy                  | CV-9             | 80         | w          | 7                | Severe                   |
| HD-12            | 30         | w          | 0                | Healthy                  | CV-13            | 71         | m          | 7                | Severe                   |
| HD-13            | 33         | w          | 0                | Healthy                  | CV-25            | 45         | w          | 7                | Severe                   |
| HD-14            | 29         | w          | 0                | Healthy                  | CV-32            | 50         | w          | 7                | Severe                   |
| HD-15            | 36         | w          | 0                | Healthy                  | CV-33            | 35         | w          | 7                | Severe                   |
| CV-1             | 22         | m          | 3                | Mild                     | CV-57            | 55         | w          | 6                | Severe                   |
| CV-19            | 52         | m          | 3                | Mild                     | CV-58            | 26         | m          | 7                | Severe                   |
| CV-23            | 44         | w          | 3                | Mild                     | CV-59            | 86         | m          | 7                | Severe                   |
| CV-35            | 37         | w          | 3                | Mild                     | CV-60            | 65         | m          | 6                | Severe                   |
| CV-37            | 78         | m          | 3                | Mild                     | CV-61            | 54         | m          | 7                | Severe                   |
| CV-49            | 72         | w          | 3                | Mild                     | CV-62            | 72         | m          | 6                | Severe                   |
| CV-56            | 58         | w          | 3                | Mild                     | CV-64            | 57         | m          | 7                | Severe                   |
| CV-65            | 22         | m          | 3                | Mild                     |                  |            |            |                  |                          |

**Supplementary Table 3** | Non-linear chromatographic gradient for COVID-19 cohort method.

| Time  | Flow rate (µl/min) | % A  | % B  |
|-------|--------------------|------|------|
| 0.00  | 5                  | 97.0 | 3.0  |
| 0.86  | 5                  | 92.9 | 7.1  |
| 2.42  | 5                  | 88.8 | 11.2 |
| 5.53  | 5                  | 84.7 | 15.3 |
| 9.38  | 5                  | 80.6 | 19.4 |
| 13.02 | 5                  | 76.4 | 23.6 |
| 15.48 | 5                  | 72.3 | 27.7 |
| 17.27 | 5                  | 68.2 | 31.8 |
| 19.00 | 5                  | 60.0 | 40.0 |
| 20.00 | 5                  | 20.0 | 80.0 |
| 20.50 | 5                  | 20.0 | 80.0 |
| 21.50 | 5                  | 97.0 | 3.0  |
| 27.50 | 5                  | 97.0 | 3.0  |

**Supplementary Table 4** | Scanning SWATH parameters for different gradients. All chromatographic gradients are linear (3-40% Buffer B) except that described in Table S2.

| Method Name | Active Gradient Length (min) | Precursor Range (m/z) | Window Width (m/z) | Cycle Time (s) | Effective Accumulation Time (ms) |
|-------------|------------------------------|-----------------------|--------------------|----------------|----------------------------------|
| Cohort      | 19                           | 800–1400              | 10                 | 1.5            | 21.7                             |
| Deglyco     | 45                           | 1000–1500             | 5                  | 3              | 28.2                             |
| IgG         | 90                           | 800–1600              | 10                 | 6              | 71.5                             |
| GPF-1       | 90                           | 500–1000              | 1                  | 6              | 11.7                             |
| GPF-2       | 90                           | 1000–1500             | 1                  | 6              | 11.7                             |
| GPF-3       | 90                           | 1500–2000             | 1                  | 6              | 11.7                             |

**Supplementary Table 5 |** Glycopeptides identified in DDA experiments and quantified across the COVID-19 cohort by OxoScan-MS.

| Genes       | Peptide                                               | Glycan Short | Position | Calc M+H  | Observed m/z | z | peak_num |
|-------------|-------------------------------------------------------|--------------|----------|-----------|--------------|---|----------|
| AHSG        | K.VC[+57.021]QDC[+57.021]PLLAPLN[+2204.772]DTR.V      | N4H5S2       | N156     | 3976.619  | 1326.2104    | 3 | 98       |
| AHSG        | R.TVVQPS[+656.228]VGAAAGPVVPPC[+57.021]PGR.I          | N1H1S1       | S346     | 2672.2971 | 891.4379     | 3 | 66       |
| FGB         | R.GTAGNALMDGASQLMGEN[+1913.677]R.T                    | N4H5S1       | N394     | 3806.5359 | 1903.7694    | 2 | 8        |
| FGB         | R.GTAGNALMDGASQLMGEN[+2204.772]R.T                    | N4H5S2       | N394     | 4097.6314 | 1366.5474    | 3 | 11       |
| HP          | K.MVSHHN[+2204.772]LTTGATLINEQWLLTTAK.N               | N4H5S2       | N184     | 4884.1647 | 1628.7245    | 3 | 1        |
| HP          | K.MVSHHN[+2861.000]LTTGATLINEQWLLTTAK.N               | N5H6S3       | N184     | 5540.3924 | 1385.8518    | 4 | 23       |
| HP          | K.VVLHPN[+2204.772]YSQVDIGLIK.L                       | N4H5S2       | N241     | 3999.7837 | 1333.9315    | 3 | 3        |
| IGHA1       | R.LAGKPTHVN[+2262.814]VSVVMAEVDGTC[+57.021].Y         | N5H5S1F1     | N340     | 4446.8931 | 1482.9686    | 3 | 172      |
| IGHA1       | R.LAGKPTHVN[+2350.830]VSVVMAEVDGTC[+57.021].Y         | N4H5S2F1     | N340     | 4534.9091 | 1512.3063    | 3 | 73       |
| IGHA1       | R.LAGKPTHVN[+2553.910]VSVVMAEVDGTC[+57.021].Y         | N5H5S2F1     | N340     | 4737.9885 | 1579.9986    | 3 | 50       |
| IGHA1;IGHA2 | R.LSLHRPALEDLLLGSEAN[+1216.423]LTC[+57.021]TLTGLR.D   | N2H5         | N144     | 4180.0211 | 1045.7597    | 4 | 130      |
| IGHA1;IGHA2 | R.LSLHRPALEDLLLGSEAN[+1501.555]LTC[+57.021]TLTGLR.D   | N5H3         | N144     | 4465.1536 | 1117.0431    | 4 | 28       |
| IGHA1;IGHA2 | R.LSLHRPALEDLLLGSEAN[+1751.624]LTC[+57.021]TLTGLR.D   | N4H4S1       | N144     | 4715.2225 | 1179.559     | 4 | 40       |
| ORM1        | K.WFYIASAFRNEEYN[+2204.772]K.S                        | N4H5S2       | N56      | 4142.6905 | 1381.5667    | 3 | 142      |
| SERPINA1    | K.YLGN[+1913.677]ATAIFFLPDEGKLQHLENELTHDIITK.F        | N4H5S1       | N271     | 5454.5143 | 1364.6344    | 4 | 39       |
| SERPINA1    | R.QLAHQSN[+2204.772]STNIFFSPVSIATAFAMLSLGTK.A         | N4H5S2       | N70      | 5386.4075 | 1796.1399    | 3 | 5        |
| TF          | R.QQQLFGSN[+2204.772]VTDC[+57.021]SGNFC[+57.021]LFR.S | N4H5S2       | N630     | 4719.8966 | 1573.9675    | 3 | 12       |

**Supplementary Table 6 I** Glycopeptides, adjacent, unmodified and QC peptides monitored by MRM-HR acquisition.

| Genes       | Molecule                                               | Precursor Charge | RT   | m/z      | Peptide Type        |
|-------------|--------------------------------------------------------|------------------|------|----------|---------------------|
| AHSG        | K.VC[+57.021]QDC[+57.021]PLLAPLN[+2204.772]DTR.V       | 3                | 14.2 | 1326.243 | Glycopeptide        |
| AHSG        | R.TVVQPS[+656.228]VGAAAGPVVPPC[+57.021]PGR.I           | 3                | 10.5 | 891.458  | Glycopeptide        |
| FGB         | R.GTAGNALMDGASQLMGEN[+1622.582]R.T                     | 3                | 14.6 | 1172.517 | Glycopeptide        |
| FGB         | R.GTAGNALMDGASQLMGEN[+1913.677]R.T                     | 3                | 14.6 | 1269.550 | Glycopeptide        |
| FGB         | R.GTAGNALMDGASQLMGEN[+2204.772]R.T                     | 3                | 14.8 | 1366.556 | Glycopeptide        |
| FGG         | K.VDKDLQSLEDILHQVEN[+1622.582]K.T                      | 4                | 17.2 | 937.209  | Glycopeptide        |
| FGG         | K.VDKDLQSLEDILHQVEN[+1913.677]K.T                      | 4                | 17.6 | 1009.979 | Glycopeptide        |
| HP          | K.MVSHHN[+2204.772]LTTGATLINEQWLLTTAK.N                | 4                | 16.6 | 1221.832 | Glycopeptide        |
| HP          | K.MVSHHN[+2350.830]LTTGATLINEQWLLTTAK.N                | 4                | 16.5 | 1258.352 | Glycopeptide        |
| HP          | K.MVSHHN[+2861.000]LTTGATLINEQWLLTTAK.N                | 4                | 16.8 | 1385.894 | Glycopeptide        |
| HP          | K.VVLHPN[+2204.772]YSQVDIGLIK.L                        | 3                | 15.0 | 1333.968 | Glycopeptide        |
| HPX         | R.SWPAVGN[+2204.772]C[+57.021]SSALR.W                  | 3                | 11.0 | 1203.846 | Glycopeptide        |
| IGHA1       | R.LAGKPTHVN[+2262.814]VSVVMAEVDGTC[+57.021].Y          | 4                | 14.2 | 1112.508 | Glycopeptide        |
| IGHA1       | R.LAGKPTHVN[+2350.830]VSVVMAEVDGTC[+57.021].Y          | 4                | 14.6 | 1134.516 | Glycopeptide        |
| IGHA1       | R.LAGKPTHVN[+2553.910]VSVVMAEVDGTC[+57.021].Y          | 4                | 14.7 | 1185.275 | Glycopeptide        |
| IGHA1;IGHA2 | R.LSLHRPALEDLLLSEAN[+1216.423]LTC[+57.021]TLTGLR.D     | 4                | 19.5 | 1045.797 | Glycopeptide        |
| IGHA1;IGHA2 | R.LSLHRPALEDLLLSEAN[+1501.555]LTC[+57.021]TLTGLR.D     | 4                | 19.4 | 1117.081 | Glycopeptide        |
| IGHA1;IGHA2 | R.LSLHRPALEDLLLSEAN[+1751.624]LTC[+57.021]TLTGLR.D     | 4                | 19.8 | 1179.601 | Glycopeptide        |
| IGHA1;IGHA2 | R.LSLHRPALEDLLLSEAN[+2116.756]LTC[+57.021]TLTGLR.D     | 4                | 19.7 | 1270.889 | Glycopeptide        |
| ORM1        | K.WFYIASAFRNEEYN[+2204.772]K.S                         | 4                | 16.7 | 1036.459 | Glycopeptide        |
| SERPINA1    | K.YLGN[+1913.677]ATAIFFLPDEGKLQHLENELTHDIITK.F         | 5                | 19.8 | 1091.751 | Glycopeptide        |
| SERPINA1    | K.YLGN[+2204.772]ATAIFFLPDEGK.L                        | 3                | 18.4 | 1320.935 | Glycopeptide        |
| SERPINA1    | R.QLAHQSN[+2204.772]STNIFFSPVSIATAFAMLSLGTK.A          | 4                | 21.0 | 1347.409 | Glycopeptide        |
| TF          | R.QQQHLFGSN[+2204.772]VTDC[+57.021]SGNFC[+57.021]LFR.S | 4                | 16.2 | 1180.763 | Glycopeptide        |
| A1BG        | HQFLLTGDTQGR                                           | 3                | 9.2  | 458.238  | QC                  |
| C3          | AAVYHHFISDGVR                                          | 3                | 7.6  | 491.254  | QC                  |
| C8G         | SLPVSDSVLSGFQR                                         | 3                | 16.4 | 540.946  | QC                  |
| CLU         | VTTVASHTSDSDVPSGVTEVVVK                                | 3                | 19.1 | 772.065  | QC                  |
| F2          | VIDQFGE                                                | 1                | 9.7  | 807.389  | QC                  |
| GC          | THLPEVFLSK                                             | 2                | 12.8 | 585.830  | QC                  |
| ITIH2       | VQFELHYQEVK                                            | 3                | 12.3 | 473.914  | QC                  |
| KNG1        | TVGSDTFYSFK                                            | 2                | 13.0 | 626.299  | QC                  |
| PLG         | VILGAHQEVNLEPHVQIEVSR                                  | 4                | 12.7 | 624.836  | QC                  |
| SERPINC1    | ATEDEGSEQKIPEATNR                                      | 3                | 17.5 | 625.630  | QC                  |
| AHSG        | TVVQPSVGAAAGPVVPPCPGR                                  | 3                | 11.1 | 672.695  | Unmodified peptides |
| AHSG        | TVVQPSVGAAAGPVVPPCPGR                                  | 2                | 11.1 | 1008.539 | Unmodified peptides |
| HP          | VVLHPNYSQVDIGLIK                                       | 2                | 14.7 | 898.009  | Unmodified peptides |
| HP          | VVLHPNYSQVDIGLIK                                       | 3                | 14.7 | 599.009  | Unmodified peptides |
| HP          | VVLHPNYSQVDIGLIK                                       | 4                | 14.7 | 449.508  | Unmodified peptides |
| HPX         | SWPAVGNCSALR                                           | 2                | 11.4 | 702.838  | Unmodified peptides |
| TF          | QQQHLFGSNVTDCSGNFCLFR                                  | 3                | 16.3 | 839.046  | Unmodified peptides |

|             |                                |   |      |         |                   |
|-------------|--------------------------------|---|------|---------|-------------------|
| AHSG        | CNLLAEK                        | 2 | 7.4  | 424.221 | Adjacent peptides |
| AHSG        | EHAVEGDCDFQLLK                 | 3 | 12.2 | 554.259 | Adjacent peptides |
| AHSG        | FSVVYAK                        | 2 | 9.4  | 407.229 | Adjacent peptides |
| HP          | DYAEVGR                        | 2 | 5.1  | 405.193 | Adjacent peptides |
| HP          | SCAVAEYGVVVK                   | 2 | 10.8 | 673.326 | Adjacent peptides |
| HP          | TEGDGVYTLNDK                   | 2 | 7.7  | 656.307 | Adjacent peptides |
| HP          | TEGDGVYTLNNEK                  | 2 | 7.5  | 720.336 | Adjacent peptides |
| HPX         | GGYTLVSGYPK                    | 2 | 10.7 | 571.298 | Adjacent peptides |
| HPX         | LYLVQGTQVYVFLTK                | 2 | 19.2 | 886.503 | Adjacent peptides |
| HPX         | SLGPNSCSANGPGLYLIHGPNLYCYSDVEK | 4 | 16.9 | 821.385 | Adjacent peptides |
| IGHA1       | QEPSQGTTFVAVTSILR              | 3 | 16.7 | 612.655 | Adjacent peptides |
| IGHA1       | SAVQGPPER                      | 2 | 4.3  | 470.746 | Adjacent peptides |
| IGHA1       | TFTCTAAYPESK                   | 2 | 7.4  | 688.314 | Adjacent peptides |
| IGHA1       | TPLTATLSK                      | 2 | 8.7  | 466.277 | Adjacent peptides |
| IGHA1;IGHA2 | NFPPSQDASGDLYTTSSQLTLPATQCPDGK | 4 | 16.3 | 799.874 | Adjacent peptides |
| IGHA2       | QEPSQGTTTYAVTSILR              | 3 | 15.0 | 617.986 | Adjacent peptides |
| ORM1        | EQLGEFYEALDCLR                 | 2 | 18.6 | 871.906 | Adjacent peptides |
| ORM1        | SDVVYTDWK                      | 2 | 10.8 | 556.767 | Adjacent peptides |
| ORM1        | YVGGQEHEFAHLLILR               | 3 | 14.5 | 584.990 | Adjacent peptides |
| TF          | CSTSSLLEACTFR                  | 2 | 13.4 | 766.348 | Adjacent peptides |
| TF          | DDTVCLAK                       | 2 | 6.3  | 461.221 | Adjacent peptides |
| TF          | IECVSAETTEDCIAK                | 2 | 8.2  | 863.387 | Adjacent peptides |
| TF          | YLGEEYVK                       | 2 | 9.7  | 500.753 | Adjacent peptides |

## References

1. Wieczorek, M., Braicu, E. I., Oliveira-Ferrer, L., Sehouli, J. & Blanchard, V. Immunoglobulin G Subclass-Specific Glycosylation Changes in Primary Epithelial Ovarian Cancer. *Front. Immunol.* **11**, 654 (2020).
2. Demichev, V., Messner, C. B., Vernardis, S. I., Lilley, K. S. & Ralser, M. DIA-NN: neural networks and interference correction enable deep proteome coverage in high throughput. *Nat. Methods* **17**, 41–44 (2020).
3. Ritchie, M. E. *et al.* limma powers differential expression analyses for RNA-sequencing and microarray studies. *Nucleic Acids Res.* **43**, e47 (2015).
4. Benjamini, Y. & Hochberg, Y. Controlling the False Discovery Rate: A Practical and Powerful Approach to Multiple Testing. *J. R. Stat. Soc. Series B Stat. Methodol.* **57**, 289–300 (1995).
